# Supplementary material for: A pre-column derivatization method allowing quantitative metabolite profiling of carboxyl and phenolic hydroxyl group containing pharmaceuticals in human plasmavialiquid chromatography-inductively coupled plasma-tandem mass spectrometry (LC-ICP-MS/MS)
Source: Royal Society of Chemistry journal article supplement (doi:10.1039/c7ja00385d), 2018-01-01

## Supporting Information

A pre-column derivatization method allowing quantitative metabolite profiling of carboxyl and phenolic hydroxyl group containing pharmaceuticals in human plasma via liquid chromatography-inductively coupled plasma-tandem mass spectrometry (LC-ICP-MS/MS)

Sanwang Li<sup>a</sup>, Balázs Klencsár<sup>a</sup>, Lieve Balcaen<sup>a</sup>, Filip Cuyckens<sup>b</sup>, Frederic Lynen<sup>c</sup>, Frank Vanhaecke<sup>a</sup>

<sup>a</sup> Ghent University, Department of Chemistry, Atomic and Mass Spectrometry Research Group (A&MS), Campus Sterre, Krijgslaan 281-S12, 9000 Ghent, Belgium

<sup>b</sup> Pharmacokinetics, Dynamics & Metabolism, Janssen R&D, Turnhoutseweg 30, 2340 Beerse, Belgium

<sup>c</sup> Ghent University, Department of Organic and Macromolecular Chemistry, Campus Sterre, Krijgslaan 281-S4-bis, 9000 Ghent, Belgium

### Table of contents

|                                                                                  |     |
|----------------------------------------------------------------------------------|-----|
| <i>Figure S-1: Investigation of the effect of the TEA concentration</i> .....    | S-2 |
| <i>Figure S-2: Investigation of the effect of the reaction temperature</i> ..... | S-3 |
| <i>Figure S-3: Investigation of the effect of the reaction time</i> .....        | S-4 |
| <i>Figure S-4: Investigation of the effect of the p-BPB concentration</i> .....  | S-5 |

**Figure S-1. Investigation of the effect of the TEA concentration: HPLC-UV chromatograms of diclofenac and 4'-hydroxy-diclofenac standard and derivatized spiked plasma samples with 2, 4, 10 and 20 mM of TEA**

**Peaks: 1: 4'-hydroxy-diclofenac; 2: diclofenac; 3: primary derivative of 4'-hydroxy-diclofenac; 4: derivative of diclofenac; 5: secondary derivative of 4'-hydroxy-diclofenac**

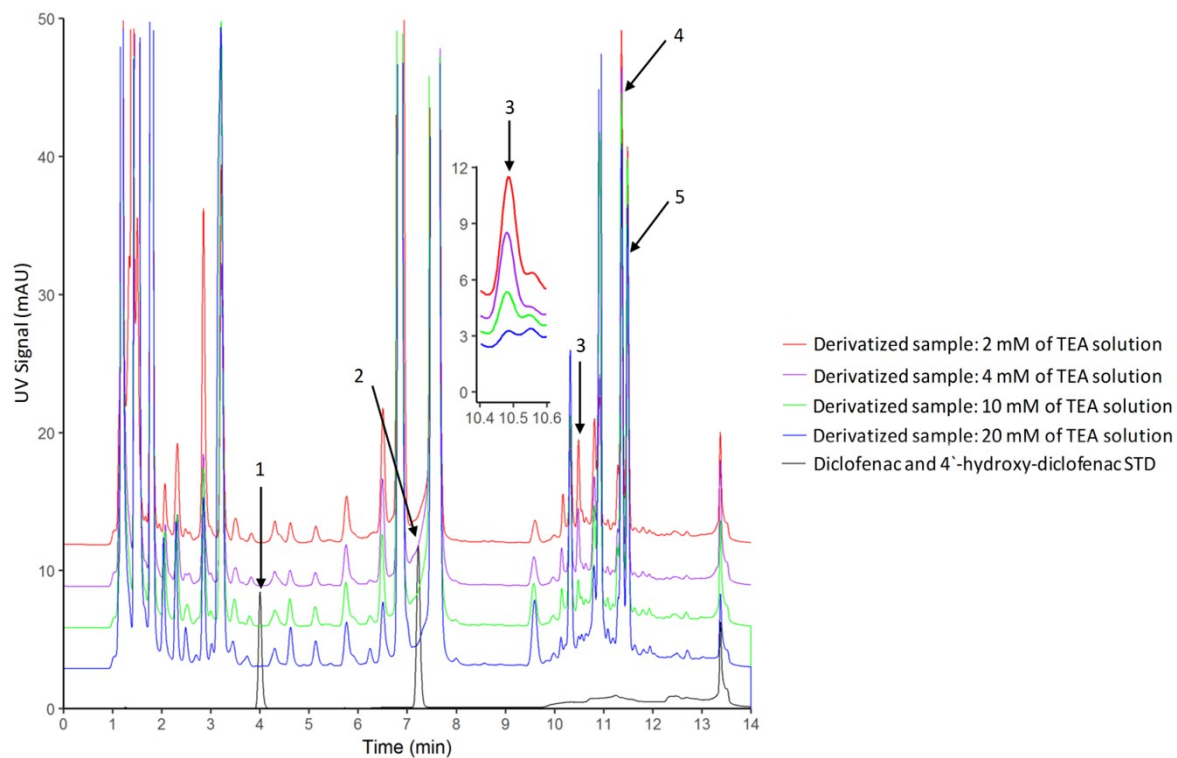

**Figure S-2. Investigation of the effect of the reaction temperature: HPLC-UV chromatograms of diclofenac and 4'-hydroxy-diclofenac standard and derivatized spiked plasma samples at room temperature, 40 °C, 60 °C and 80 °C**

**Peaks: 1: 4'-hydroxy-diclofenac; 2: diclofenac; 3: primary derivative of 4'-hydroxy-diclofenac; 4: derivative of diclofenac; 5: secondary derivative of 4'-hydroxy-diclofenac**

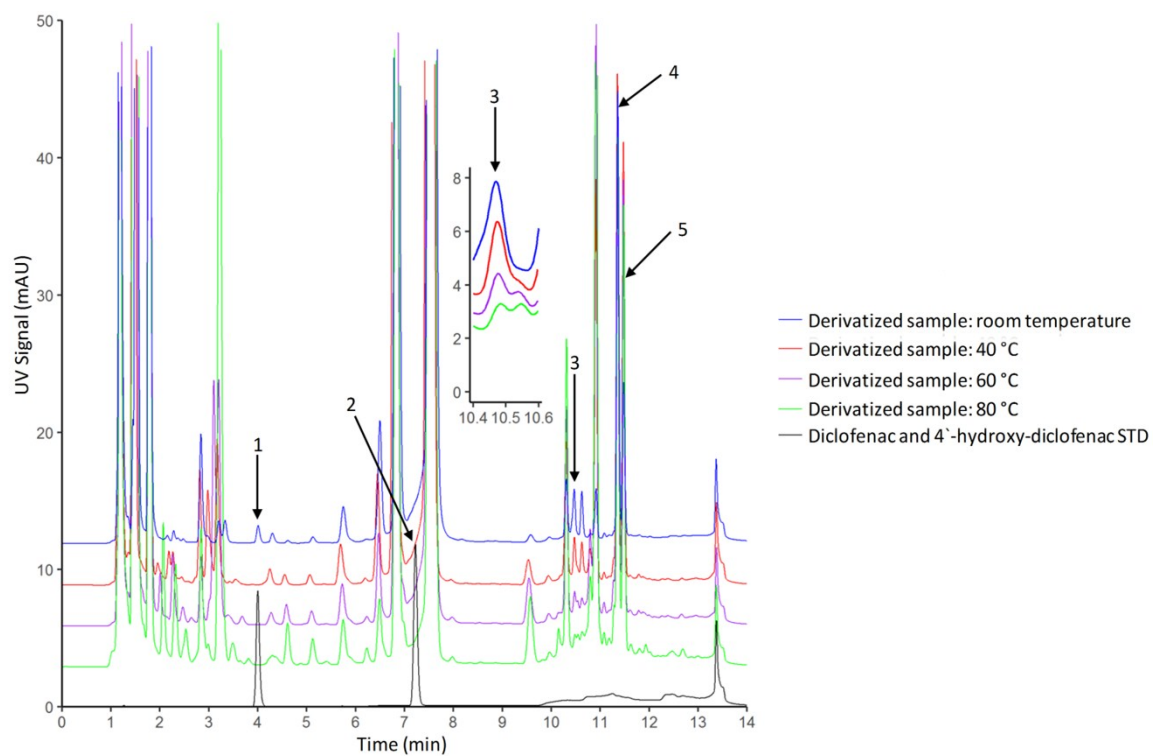

**Figure S-3. Investigation of the effect of the reaction time: HPLC-UV chromatograms of diclofenac and 4'-hydroxy-diclofenac standard and derivatized spiked plasma samples at 80 °C with 15 min, 30 min, 45 min and 60 min reaction time**  
**Peaks: 1: 4'-hydroxy-diclofenac; 2: diclofenac; 3: primary derivative of 4'-hydroxy-diclofenac; 4: derivative of diclofenac; 5: secondary derivative of 4'-hydroxy-diclofenac**

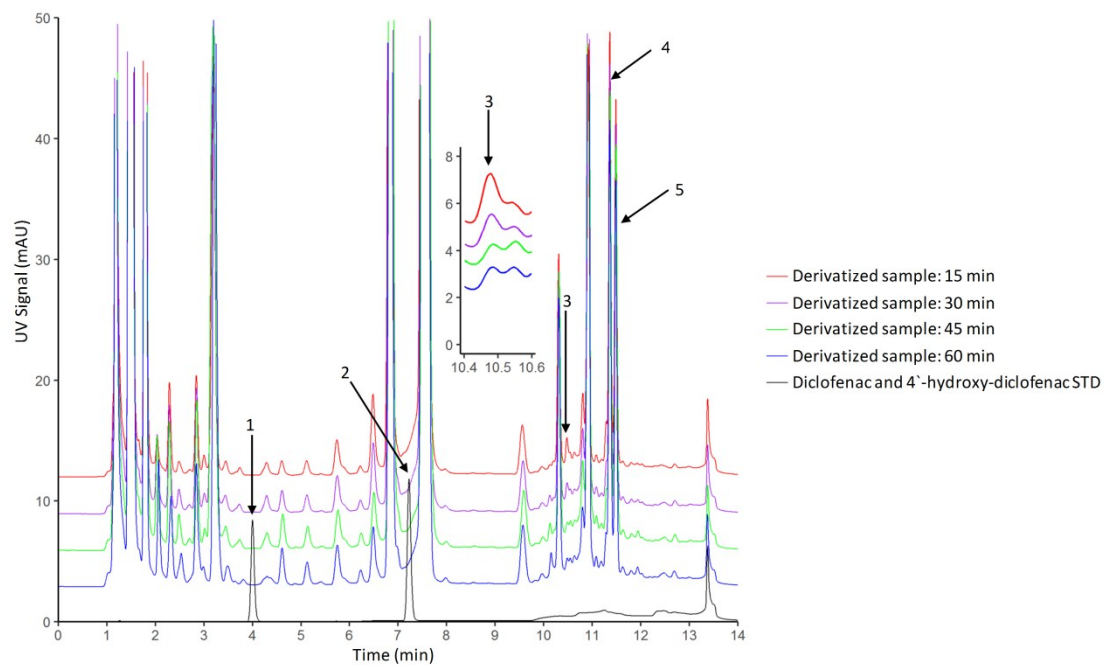

**Figure S-4. Investigation of the effect of the *p*-BPB concentration: HPLC-UV chromatograms of diclofenac and 4'-hydroxy-diclofenac standard and derivatized spiked plasma samples with 4, 8, 20 and 40 mM of *p*-BPB**

**Peaks: 1: 4'-hydroxy-diclofenac; 2: diclofenac; 3: primary derivative of 4'-hydroxy-diclofenac; 4: derivative of diclofenac; 5: secondary derivative of 4'-hydroxy-diclofenac**

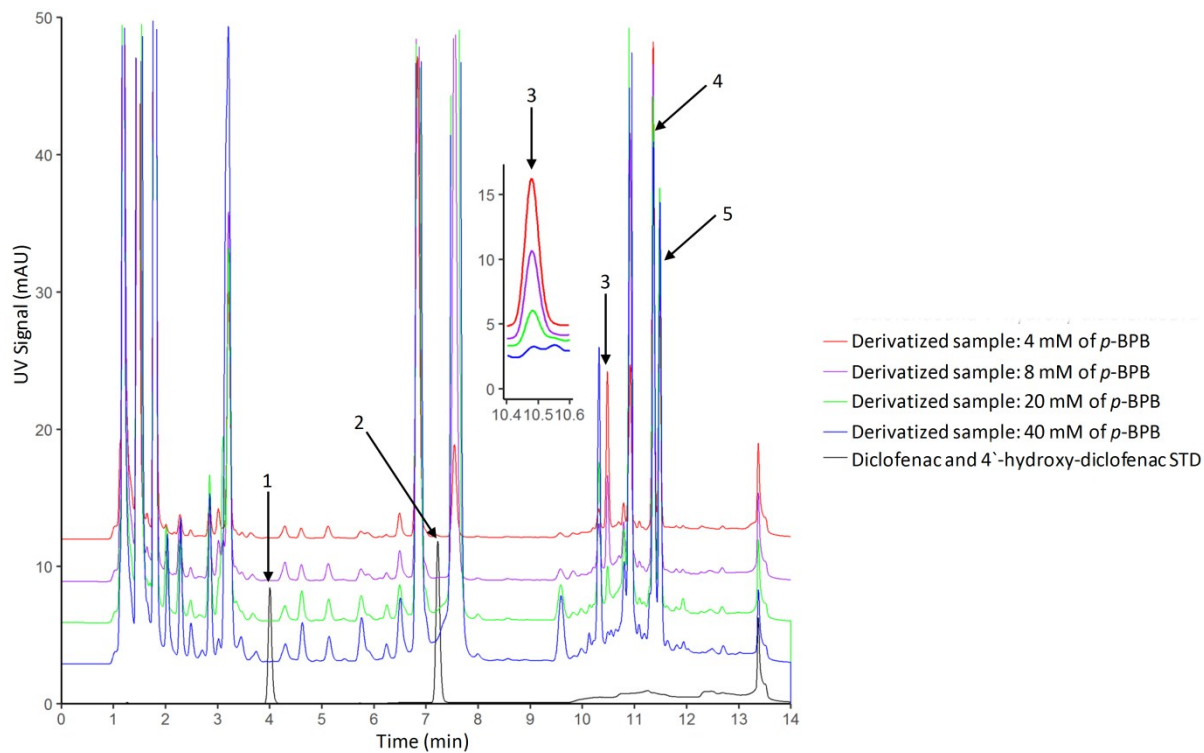

Supplement: c7ja00385d1.pdf [file c7ja00385d1.pdf]
